# Supplementary material for: Selective egg cell polyspermy bypasses the triploid block
Source: eLife. 2020 Feb 6;9:e52976. doi: 10.7554/eLife.52976 (PMC7004562; doi:10.7554/eLife.52976)
Supplement: Figure 2—source data 1. [file elife-52976-fig2-data1.xlsx]

## Sheet: CENH3 for chromosome counting 
Characterization of CENH3-GFP foci in embryos resulting from different crosses
Cross	Chromosomes numbers										N
	7	8	9	10	11	12	13	14	15	16
seed 1			1	2	4	5	12	12	5	2	43
seed 2					1		4		2		7
seed 3			2	2	4	10	7	3	4		32
2n × 2n*	7	20	18	11		1					57
4n × 2n§		1	1		4	11	13	23	20	5	78
Characterization of CENH3-GFP foci in the endosperm of seeds resulting from different crosses
Cross	Chromosomes numbers										N
	11	12	13	14	15	20	21	23	24	25
seed 1		1			2						3
seed 2			2	1	1						4
seed 3		2		2	1						5
2n × 2n*	2	5	2	9	8						26
4n × 2n§						1	2	1	1	1	6
The seeds 1, 2, 3 are HIPODSCO1-recovered
* pUAS:SCO1-tdTOMATO/+ sco1 × pRPS5a::mGAL4:VP16 /+ sco1 p35S::CENH3-GFP
§ wild type (4n) × pRPS5a::mGAL4:VP16 /+ sco1 p35S::CENH3-GFP
N, number of embryo or endosperm cells counted
