# Supplementary material for: Selective egg cell polyspermy bypasses the triploid block
Source: eLife. 2020 Feb 6;9:e52976. doi: 10.7554/eLife.52976 (PMC7004562; doi:10.7554/eLife.52976)
Supplement: Figure 3—source data 1. [file elife-52976-fig3-data1.xlsx]

## Sheet: Sheet1
Crosses		WT		adm		Ratio of adm/WT
		Viable triploids	Total seeds	Viable triploids	Total seeds
Polyspermy	Experiment 1	9	55629	17	54486	1.93
	Experiment 2	6	27608	14	29822	2.16
	Experiment 3	12	30540	16	31971	1.27
Interploidy cross	Experiment 1	50	656	515	686	9.85
	Experiment 2	10	450	170	418	18.3
	Experiment 3	18	713	354	750	18.7
