# Supplementary material for: Selective egg cell polyspermy bypasses the triploid block
Source: eLife. 2020 Feb 6;9:e52976. doi: 10.7554/eLife.52976 (PMC7004562; doi:10.7554/eLife.52976)
Supplement: Supplementary file 1. [file elife-52976-supp1.xlsx]

## Sheet: Sheet1
Oligos	Sequence (5'-3')	Application
DT231s (AvrII)	CCTAGGATGGCGAGAACCAAGCATCGCGTTAC	Amplification of CDS of CENH3
DT231as (MfeI)	CAATTGCCATGGTCTGCCTTTTCCTCCAAGC
YM1-F (PacI)	CGTTAATTAAATGGCGGCGGATGCTCTGAG	Amplification of CDS of SCO1
YM2-R (NotI)	CAGCGGCCGCAGCAGCAACTTCTTGATCCT
YM7-LP	TTATCGCCAAATCAAGTTTGC	sco1 mutant genotyping
YM8-RP	GCTTCGCCTCGGCTATATAAC
TN12s	ATTTAATTAAATGAAGCTCCT GTCCTCCATCGA	GAL4 detection
TN12as	ATGCGGCCGCCTACCCACCGTACTCGTCAATTC
TN26s	GCAGGAGTGGACGGACGACCTCGTCCGTCTG	UAS detection
TN26as	TCACGAACTCCAGCAGGACCATGTGATCGCG
